# Supplementary material
Source: PubMed Central journal article supplement (PMC3318110)
Supplement: cc1104_0807SD1.pdf [file cc1104_0807SD1.pdf]

## Supplement 1

Aurora A kinase inhibition induces apoptosis in HCT 116 parental cells and polyploidy in HCT 116 (p53<sup>-/-</sup>) cells as determined time lapse Video microscopy. HCT116 and HCT 116 (p53<sup>-/-</sup>) cells transiently transfected with GFP-histone 2B were treated with 1  $\mu$ M MK8745 and live cell imaging was done for as described in Materials and Methods.

A. Shown is a video of live imaging taken every 5 minutes in HCT 116 cells after 4 hours of exposure to MK8745 to 48 hours. B. Video of live imaging taken every 5 minutes in HCT 116 (p53<sup>-/-</sup>) cells after 18 hours of exposure to MK8745 to 48 hours.

Supplement 1 A and B

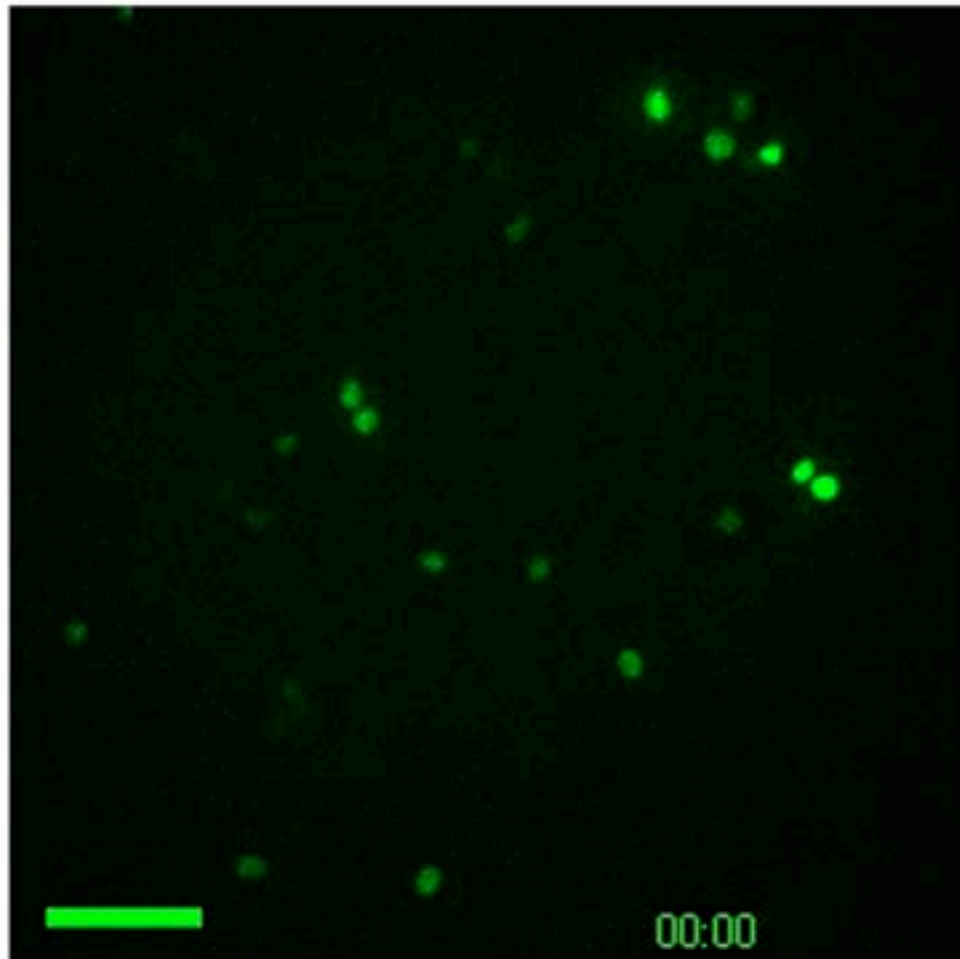

HCT116 cells transiently transfected with GFPH2B were treated with 1  $\mu$ M MK8745 and observed from 4 hours to 48 hours

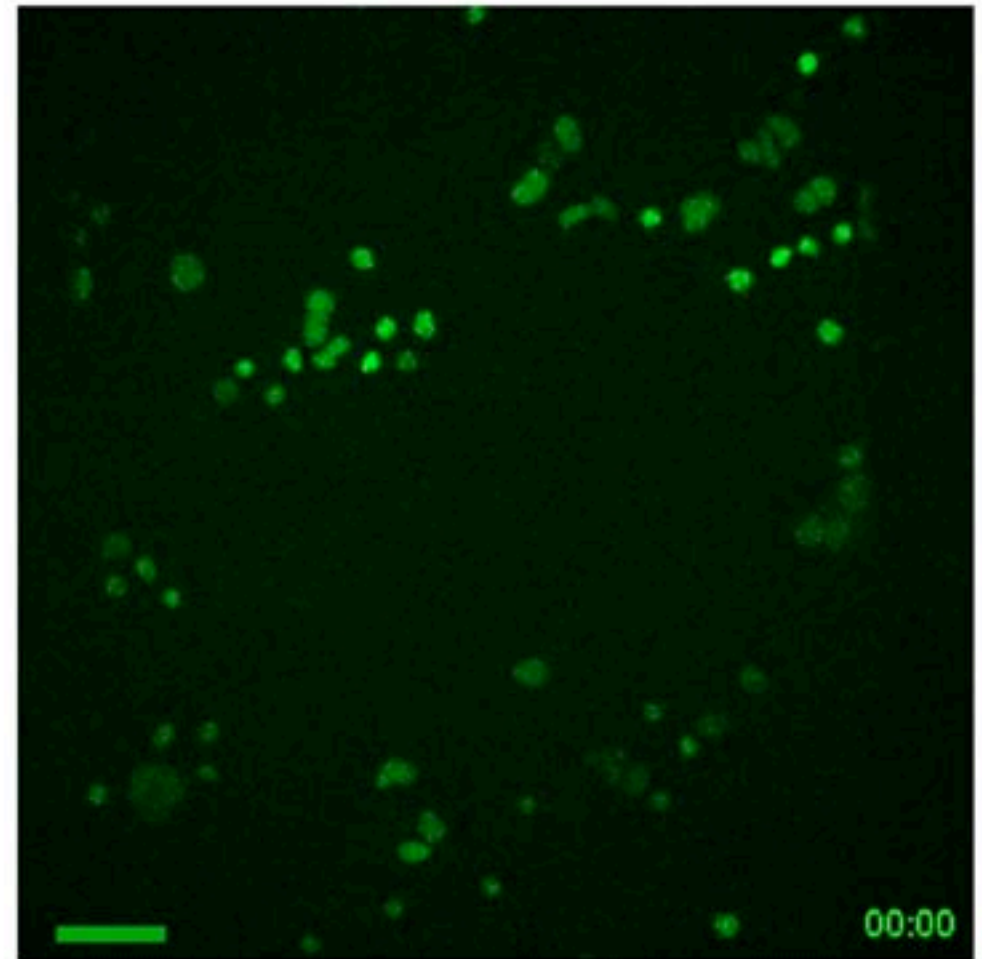

HCT116 p53<sup>-/-</sup> cells transfected with GFPH2B were treated with 1  $\mu$ M MK8745 and observed from 18 hours to 48 hours
